# Supplementary material for: Short-Term PE Generation Processes in the Soils of a Farmer Plots Network in the Madagascar Highlands: Actors and Drivers
Source: MDPI journal article supplement (doi:10.3390/microbiolres14040117), 2023-10-27
Supplement: s1 [file s1]

**Table S1a.** environmental description and agricultural history of plots sampled.

| SAMPLE | Topography  | Longitude | Latitude   | Altitude | Land use     | OS_Legume        | OS_Tuber         | OS_Cereal        | OS_Fallow        | Legume           | Tuber            | Cereal           | Fallow           | OS_Cornpost      | OS_Cattle manure | Compost          | Cattle manure    | Trees count     |
|--------|-------------|-----------|------------|----------|--------------|------------------|------------------|------------------|------------------|------------------|------------------|------------------|------------------|------------------|------------------|------------------|------------------|-----------------|
|        |             | DD        | DD         | m        |              | absence/presence | number of trees |
| PA1    | Slope       | 47.346633 | -18.961317 | 1288     | Agroforestry | 0                | 1                | 0                | 0                | 0                | 1                | 0                | 0                | 0                | 1                | 0                | 1                | 668             |
| PA2    | Slope       | 47.297983 | -18.968817 | 1316     | Agroforestry | 1                | 0                | 0                | 0                | 0                | 1                | 0                | 0                | 0                | 1                | 0                | 1                | 22              |
| PA3    | Bottom hill | 47.345967 | -18.93695  | 1343     | Agroforestry | 0                | 1                | 0                | 0                | 1                | 0                | 0                | 0                | 0                | 1                | 0                | 0                | 13              |
| PA4    | Slope       | 47.349417 | -18.943917 | 1377     | Agroforestry | 0                | 1                | 0                | 0                | 1                | 0                | 0                | 0                | 0                | 1                | 1                | 0                | 400             |
| PA5    | Bottom hill | 47.3415   | -18.935783 | 1314     | Agroforestry | 0                | 1                | 0                | 0                | 0                | 1                | 0                | 0                | 0                | 1                | 0                | 0                | 18              |
| PA6    | Bottom hill | 47.352417 | -18.955833 | 1284     | Agroforestry | 0                | 1                | 0                | 0                | 1                | 1                | 0                | 0                | 0                | 1                | 0                | 1                | 33              |
| PA7    | Baiboho     | 47.250167 | -18.965383 | 1296     | Agroforestry | 0                | 1                | 0                | 0                | 0                | 1                | 0                | 0                | 0                | 1                | 0                | 1                | 1043            |
| PA8    | Bottom hill | 47.278083 | -18.972383 | 1338     | Agroforestry | 0                | 0                | 0                | 1                | 0                | 1                | 0                | 0                | 0                | 0                | 0                | 0                | 226             |
| PA9    | Slope       | 47.282    | -18.973417 | 1342     | Agroforestry | 1                | 0                | 1                | 0                | 0                | 0                | 0                | 1                | 0                | 0                | 0                | 0                | 22              |
| PS1    | Baiboho     | 47.34955  | -18.960067 | 1299     | Subsistence  | 0                | 0                | 1                | 0                | 0                | 1                | 0                | 0                | 1                | 0                | 0                | 1                | 0               |
| PS2    | Bottom hill | 47.2975   | -18.96885  | 1317     | Subsistence  | 0                | 1                | 0                | 0                | 0                | 1                | 0                | 0                | 0                | 1                | 0                | 1                | 0               |
| PS3    | Baiboho     | 47.2975   | -18.969167 | 1316     | Subsistence  | 0                | 0                | 0                | 1                | 0                | 0                | 1                | 0                | 0                | 0                | 0                | 0                | 0               |
| PS4    | Baiboho     | 47.301133 | -18.96905  | 1304     | Subsistence  | 1                | 0                | 0                | 0                | 0                | 0                | 1                | 0                | 0                | 1                | 0                | 1                | 0               |
| PS5    | Bottom hill | 47.3015   | -18.9668   | 1300     | Subsistence  | 1                | 1                | 0                | 0                | 0                | 1                | 0                | 0                | 0                | 1                | 0                | 0                | 0               |
| PS6    | Bottom hill | 47.3386   | -18.944383 | 1315     | Subsistence  | 0                | 1                | 0                | 0                | 0                | 1                | 0                | 0                | 0                | 1                | 0                | 0                | 0               |
| PS7    | Bottom hill | 47.346967 | -18.9437   | 1346     | Subsistence  | 1                | 0                | 0                | 0                | 0                | 1                | 0                | 0                | 1                | 0                | 0                | 1                | 0               |
| PS8    | Bottom hill | 47.3433   | -18.948633 | 1304     | Subsistence  | 1                | 0                | 0                | 0                | 0                | 1                | 0                | 0                | 1                | 0                | 0                | 1                | 0               |
| PS9    | Bottom hill | 47.34615  | -18.9481   | 1314     | Subsistence  | 1                | 0                | 0                | 0                | 1                | 1                | 0                | 0                | 1                | 0                | 0                | 1                | 0               |
| PS10   | Bottom hill | 47.346117 | -18.948167 | 1314     | Subsistence  | 0                | 1                | 0                | 0                | 0                | 0                | 1                | 0                | 0                | 1                | 1                | 0                | 0               |
| PS11   | Bottom hill | 47.351883 | -18.961117 | 1303     | Subsistence  | 0                | 1                | 0                | 0                | 0                | 0                | 0                | 1                | 0                | 1                | 0                | 0                | 0               |
| PS12   | Bottom hill | 47.254367 | -18.9595   | 1296     | Subsistence  | 0                | 0                | 0                | 1                | 0                | 0                | 0                | 1                | 0                | 0                | 0                | 0                | 0               |
| PS13   | Baiboho     | 47.254533 | -18.9585   | 1287     | Subsistence  | 0                | 1                | 0                | 0                | 0                | 0                | 0                | 1                | 0                | 1                | 0                | 0                | 0               |
| PS14   | Slope       | 47.27795  | -18.969383 | 1348     | Subsistence  | 0                | 0                | 1                | 0                | 0                | 1                | 0                | 0                | 0                | 1                | 0                | 1                | 0               |
| PS15   | Bottom hill | 47.27475  | -18.972467 | 1322     | Subsistence  | 0                | 0                | 1                | 0                | 1                | 0                | 1                | 0                | 1                | 0                | 1                | 0                | 0               |
| PS16   | Bottom hill | 47.280667 | -18.97175  | 1346     | Subsistence  | 1                | 0                | 0                | 0                | 0                | 1                | 0                | 0                | 0                | 0                | 0                | 0                | 0               |
| PS17   | Bottom hill | 47.27272  | -19.02569  | 1370     | Subsistence  | 0                | 1                | 0                | 0                | 1                | 0                | 1                | 0                | 0                | 1                | 1                | 0                | 0               |
| PS18   | Baiboho     | 47.27287  | -19.02555  | 1370     | Subsistence  | 1                | 0                | 0                | 0                | 0                | 0                | 0                | 0                | 0                | 0                | 0                | 0                | 0               |
| PS19   | Slope       | 47.275867 | -19.02005  | 1414     | Subsistence  | 0                | 0                | 0                | 0                | 0                | 1                | 0                | 0                | 1                | 1                | 0                | 0                | 0               |
| PS20   | Bottom hill | 47.27255  | -19.021383 | 1374     | Subsistence  | 1                | 0                | 0                | 0                | 0                | 1                | 0                | 0                | 0                | 0                | 0                | 0                | 0               |
| PS21   | Bottom hill | 47.272833 | -19.019633 | 1382     | Subsistence  | 0                | 0                | 0                | 1                | 0                | 0                | 0                | 1                | 0                | 0                | 0                | 0                | 0               |
| PS22   | Bottom hill | 47.274717 | -19.022133 | 1392     | Subsistence  | 0                | 0                | 0                | 0                | 0                | 0                | 0                | 0                | 0                | 1                | 0                | 0                | 0               |
| PS23   | Slope       | 47.275033 | -19.021383 | 1394     | Subsistence  | 0                | 1                | 0                | 0                | 0                | 1                | 0                | 0                | 0                | 0                | 0                | 1                | 0               |
| PS24   | Bottom hill | 47.27295  | -19.019583 | 1384     | Subsistence  | 0                | 1                | 0                | 0                | 1                | 0                | 0                | 0                | 0                | 1                | 0                | 1                | 0               |

All explanatory variables (physicochemical and microbial) were measured before incubation

All C mineralization rates were measured at 7 days of incubation

Abbreviations list: DD: Decimal degree; OS: off-season; C,E,C<sub>1</sub>: Cation exchange capacity; tot: total; Kt :kaolinite; Gb: gibbsite; C:N: Carbon-to-Nitrogen ratio; min: mineral; av: available; MBP: microbial phosphorus; BR: basal respiration; SM: Straw mineralization; PE: Priming Effect.

**Table S1b.** edaphic parameters of soil samples.

| SAMPLE | Clay  | Silt | Sand  | Soil bulk density | Soil humidity | Kt <sub>p</sub> predict | Gb <sub>p</sub> predict | Fe2O3 <sub>cbd</sub> | pH   | C <sub>1</sub> E <sub>1</sub> C <sub>1</sub> | C <sub>tot</sub> | N <sub>tot</sub> | P <sub>tot</sub> | Soil C:N ratio | OM     | OM-LF | OM-200-2000μm | OM-50-200μm | OM-20-50μm | OM-0-20μm | NH4   | NO3   | avP  |
|--------|-------|------|-------|-------------------|---------------|-------------------------|-------------------------|----------------------|------|----------------------------------------------|------------------|------------------|------------------|----------------|--------|-------|---------------|-------------|------------|-----------|-------|-------|------|
|        |       |      |       |                   |               |                         |                         |                      |      |                                              |                  |                  |                  |                |        |       |               |             |            |           |       |       |      |
| PA1    | 53.12 | 3.98 | 42.89 | 1.14              | 12.58         | 442.61                  | 223.55                  | 37.083               | 5.56 | 1.41                                         | 17.13            | 1.08             | 0.59             | 15.85          | 17.13  | 0.65  | 0.06          | 0.90        | 0.91       | 14.61     | 1.2   | 2.52  | 0.18 |
| PA2    | 45.42 | 4.46 | 50.11 | 1.24              | 17.69         | 473.26                  | 294.2                   | 37.666               | 5.32 | 1.71                                         | 12.11            | 0.80             | 0.53             | 15.22          | 12.11  | 1.21  | 0.07          | 1.18        | 0.54       | 9.10      | 6.09  | 0.42  | 0.58 |
| PA3    | 55.43 | 3.13 | 41.44 | 1.21              | 15.85         | 568.15                  | 77.73                   | 35.605               | 5.35 | 2.13                                         | 10.55            | 0.68             | 0.54             | 15.6           | 10.94  | 0.32  | 0.19          | 0.75        | 0.39       | 9.28      | 7.25  | 6.41  | 1.15 |
| PA4    | 63.68 | 4.89 | 31.43 | 1.31              | 27.41         | 392.1                   | 255.39                  | 52.108               | 5.27 | 1.43                                         | 27.96            | 1.40             | 0.75             | 20.00          | 29.41  | 2.19  | 0.46          | 0.35        | 1.45       | 24.95     | 22.52 | 8.8   | 1.02 |
| PA5    | 45.37 | 4.65 | 49.98 | 1.25              | 12.22         | 322.15                  | 508.58                  | 36.503               | 5.15 | 1.00                                         | 15.69            | 1.02             | 0.68             | 15.32          | 15.69  | 0.66  | 0.05          | 0.44        | 0.34       | 14.19     | 3.78  | 8.04  | 0.79 |
| PA6    | 58.69 | 8.8  | 32.51 | 1.22              | 17.47         | 491.37                  | 326.36                  | 24.797               | 5.57 | 2.89                                         | 9.89             | 0.71             | 0.73             | 14.02          | 10.67  | 0.75  | 0.06          | 0.94        | 0.78       | 8.13      | 2.15  | 3.44  | 0.37 |
| PA7    | 46.12 | 4.53 | 49.35 | 1.16              | 15.19         | 396.81                  | 232.03                  | 53.369               | 4.62 | 1.07                                         | 17.03            | 0.99             | 0.75             | 17.27          | 17.59  | 0.14  | 0.32          | 0.62        | 0.56       | 15.94     | 3.65  | 3.81  | 1.28 |
| PA8    | 51.74 | 5.34 | 42.92 | 1.01              | 17.39         | 182.73                  | 372.2                   | 59.096               | 5.04 | 0.76                                         | 24.92            | 1.41             | 0.52             | 17.72          | 25.94  | 0.58  | 0.18          | 1.01        | 1.02       | 23.15     | 2.95  | 9.49  | 2.23 |
| PA9    | 52.23 | 5.67 | 42.11 | 1.25              | 15.18         | 238.15                  | 393                     | 60.134               | 4.77 | 0.76                                         | 17.64            | 1.00             | 0.6              | 17.6           | 17.64  | 1.31  | 0.05          | 0.48        | 1.36       | 14.44     | 3.71  | 9.63  | 0.97 |
| PS1    | 47.82 | 4.22 | 47.96 | 1.29              | 11.52         | 218.32                  | 400.9                   | 53.082               | 4.91 | 1.50                                         | 18.55            | 0.96             | 0.74             | 19.36          | 18.55  | 2.56  | 0.04          | 0.78        | 0.93       | 14.23     | 8.24  | 0.25  | 0.89 |
| PS2    | 51.9  | 3.25 | 44.85 | 1.15              | 17.77         | 430.77                  | 323.24                  | 31.37                | 5.05 | 1.26                                         | 17.65            | 1.00             | 0.43             | 17.59          | 17.65  | 0.63  | 0.09          | 1.07        | 0.56       | 15.29     | 3.82  | 3.85  | 0.69 |
| PS3    | 57.6  | 3.82 | 38.59 | 1.09              | 15.61         | 387.37                  | 294.2                   | 39.691               | 4.64 | 1.19                                         | 21.61            | 1.27             | 0.54             | 17.05          | 22.68  | 2.37  | 0.04          | 1.07        | 1.07       | 18.12     | 3.39  | 4.93  | 1.92 |
| PS4    | 52.32 | 3.11 | 44.57 | 1.14              | 13.33         | 427.51                  | 313.27                  | 48.401               | 4.94 | 1.15                                         | 16.12            | 0.93             | 0.39             | 17.27          | 16.12  | 0.91  | 0.10          | 2.91        | 0.53       | 11.67     | 2.94  | 5.44  | 6.43 |
| PS5    | 60.43 | 4.7  | 34.87 | 1.16              | 14.69         | 377.93                  | 274.61                  | 46.65                | 4.86 | 1.41                                         | 21.89            | 1.22             | 0.68             | 17.9           | 21.89  | 0.82  | 0.10          | 0.41        | 0.46       | 20.10     | 3.75  | 6.36  | 1.23 |
| PS6    | 44.32 | 4.28 | 51.41 | 1.33              | 18.75         | 290.24                  | 340.81                  | 60.416               | 4.85 | 1.13                                         | 15.37            | 0.97             | 0.51             | 15.81          | 15.37  | 0.74  | 0.20          | 0.65        | 1.02       | 12.76     | 2.44  | 1.03  | 4.03 |
| PS7    | 48.14 | 4.16 | 47.7  | 1.1               | 26.53         | 559.06                  | 76.09                   | 14.236               | 4.66 | 1.72                                         | 15.65            | 1.03             | 0.35             | 15.27          | 15.65  | 0.37  | 0.13          | 0.89        | 0.54       | 13.71     | 4.11  | 10.86 | 1.39 |
| PS8    | 50.24 | 7.09 | 42.68 | 1.12              | 27.63         | 415.3                   | 131.14                  | 24.801               | 4.93 | 1.53                                         | 18.09            | 1.16             | 0.45             | 15.62          | 18.09  | 0.76  | 0.10          | 1.23        | 1.06       | 14.94     | 5.66  | 4.73  | 0.94 |
| PS9    | 45.23 | 6.09 | 48.67 | 1.19              | 21.13         | 320.93                  | 278.39                  | 30.107               | 4.66 | 1.27                                         | 16.09            | 0.97             | 0.58             | 16.62          | 16.09  | 0.84  | 0.12          | 0.29        | 1.01       | 13.83     | 3.02  | 3.92  | 1.13 |
| PS10   | 43.38 | 7.07 | 49.55 | 1.24              | 23.73         | 382.22                  | 166.95                  | 25.517               | 4.93 | 1.59                                         | 18.01            | 1.15             | 0.7              | 15.69          | 18.66  | 0.65  | 0.25          | 0.36        | 0.65       | 16.76     | 7.27  | 0.31  | 1.1  |
| PS11   | 44.17 | 5.8  | 50.03 | 1.24              | 15.06         | 302.37                  | 317.43                  | 49.516               | 5.79 | 1.80                                         | 24.22            | 1.69             | 0.78             | 14.34          | 24.22  | 1.51  | 0.13          | 6.92        | 1.82       | 13.83     | 2.47  | 5.87  | 1.75 |
| PS12   | 43.97 | 5.89 | 50.15 | 1.46              | 10.37         | 438.28                  | 295.91                  | 13.241               | 5.32 | 1.35                                         | 15.97            | 0.94             | 0.3              | 16.95          | 15.97  | 1.46  | 0.14          | 0.43        | 1.42       | 12.51     | 4.29  | 7.39  | 2.03 |
| PS13   | 51.14 | 6.16 | 42.71 | 1.16              | 12.87         | 452.26                  | 380.12                  | 29.386               | 4.88 | 0.94                                         | 13.4             | 0.82             | 0.39             | 16.28          | 13.4   | 0.46  | 0.02          | 0.43        | 0.79       | 11.70     | 3.63  | 2.86  | 0.9  |
| PS14   | 44.86 | 5.06 | 50.08 | 1.18              | 16.26         | 208.97                  | 298.38                  | 57.777               | 4.65 | 0.86                                         | 22.63            | 1.29             | 0.67             | 17.52          | 22.63  | 0.61  | 0.06          | 1.17        | 0.76       | 20.02     | 3.61  | 10.02 | 1.98 |
| PS15   | 54.89 | 5.03 | 40.08 | 1.21              | 21.01         | 182.26                  | 434.54                  | 57.693               | 4.88 | 0.72                                         | 21.89            | 1.19             | 0.67             | 18.39          | 23.31  | 0.46  | 0.22          | 1.47        | 1.42       | 19.74     | 4.93  | 5.97  | 1.72 |
| PS16   | 55.76 | 5.19 | 39.06 | 1.16              | 18.21         | 197.25                  | 335.59                  | 62.151               | 4.99 | 0.91                                         | 24.43            | 1.37             | 0.73             | 17.79          | 24.43  | 0.69  | 0.04          | 1.47        | 0.99       | 21.24     | 10.47 | 9.2   | 0.94 |
| PS17   | 60.03 | 5.23 | 34.74 | 1.11              | 14.87         | 295.87                  | 320.47                  | 36.704               | 4.93 | 1.29                                         | 26.24            | 1.65             | 0.75             | 15.91          | 27.19  | 0.72  | 0.18          | 0.79        | 0.95       | 24.54     | 2.75  | 8.95  | 0.51 |
| PS18   | 52.19 | 4.97 | 42.85 | 1.12              | 17.75         | 300.13                  | 352.52                  | 41.468               | 4.96 | 1.46                                         | 26.00            | 1.62             | 1.03             | 16.04          | 26.000 | 1.12  | 0.08          | 0.84        | 0.75       | 23.20     | 3.68  | 7.07  | 1.2  |
| PS19   | 74.86 | 4.73 | 20.4  | 1                 | 31.28         | 458.76                  | 348.97                  | 13.108               | 4.93 | 1.65                                         | 22.69            | 1.38             | 0.54             | 16.49          | 22.69  | 1.76  | 0.04          | 2.98        | 0.87       | 17.03     | 3.23  | 5.69  | 1.05 |
| PS20   | 67.73 | 8.25 | 24.01 | 1.06              | 27.26         | 382.19                  | 499.09                  | 22.336               | 5.30 | 1.72                                         | 16.37            | 1.10             | 0.79             | 14.88          | 16.37  | 1.07  | 0.03          | 1.74        | 1.58       | 11.94     | 4.03  | 5.23  | 2.6  |
| PS21   | 68.08 | 5.22 | 26.7  | 1.02              | 24            | 349.48                  | 387.1                   | 33.678               | 4.81 | 1.24                                         | 24.28            | 1.45             | 0.76             | 16.73          | 24.28  | 0.58  | 0.05          | 2.09        | 1.38       | 20.18     | 2.55  | 8.16  | 1.8  |

|                                 |       |       |       |      |       |        |        |        |      |      |       |      |      |       |       |      |      |      |      |       |       |       |      |
|---------------------------------|-------|-------|-------|------|-------|--------|--------|--------|------|------|-------|------|------|-------|-------|------|------|------|------|-------|-------|-------|------|
| PS22                            | 58.78 | 11.58 | 29.64 | 0.8  | 35.52 | 244.46 | 524.08 | 38.845 | 5.49 | 1.79 | 26.32 | 1.10 | 0.68 | 23.89 | 29.48 | 6.71 | 0.09 | 4.62 | 3.16 | 14.90 | 2.07  | 9.02  | 1.64 |
| PS23                            | 74.9  | 3.5   | 21.6  | 1.17 | 27.76 | 361.96 | 344.01 | 45.374 | 4.91 | 1.33 | 18.64 | 1.18 | 0.76 | 15.74 | 18.64 | 0.74 | 0.03 | 0.71 | 0.68 | 16.46 | 4.11  | 8.34  | 2.08 |
| PS24                            | 70.66 | 4.6   | 24.73 | 1    | 20.44 | 351.36 | 449.07 | 36.29  | 5.43 | 1.99 | 22.39 | 1.22 | 0.7  | 18.37 | 22.39 | 1.74 | 0.07 | 2.41 | 1.25 | 16.93 | 3.18  | 7.95  | 2.26 |
| <b>Minimum</b>                  | 43.38 | 3.11  | 20.4  | 0.8  | 10.37 | 182.26 | 76.09  | 13.108 | 4.62 | 0.72 | 9.89  | 0.68 | 0.3  | 14.02 | 10.67 | 0.14 | 0.02 | 0.29 | 0.34 | 8.13  | 1.2   | 0.25  | 0.18 |
| <b>Maximum</b>                  | 74.9  | 11.58 | 51.41 | 1.46 | 35.52 | 568.15 | 524.08 | 62.151 | 5.79 | 2.89 | 27.96 | 1.69 | 1.03 | 23.89 | 29.48 | 6.71 | 0.46 | 6.92 | 3.16 | 24.95 | 22.52 | 10.86 | 6.43 |
| <b>Median</b>                   | 52.23 | 4.97  | 42.71 | 1.16 | 17.69 | 377.93 | 323.24 | 37.666 | 4.93 | 1.35 | 18.09 | 1.10 | 0.67 | 16.62 | 18.55 | 0.75 | 0.09 | 0.90 | 0.93 | 14.94 | 3.68  | 5.97  | 1.2  |
| <b>Mean</b>                     | 54.4  | 5.28  | 40.31 | 1.16 | 19.22 | 358.87 | 320.30 | 39.64  | 5.04 | 1.39 | 19.31 | 1.14 | 0.62 | 16.85 | 19.66 | 1.15 | 0.11 | 1.35 | 1.00 | 16.04 | 4.63  | 5.94  | 1.54 |
| <b>Standard Error</b>           | 8.96  | 1.71  | 9.18  | 0.11 | 6.11  | 101.63 | 105.84 | 14.05  | 0.30 | 0.44 | 4.70  | 0.25 | 0.15 | 1.83  | 4.99  | 1.14 | 0.09 | 1.34 | 0.53 | 4.31  | 3.68  | 2.96  | 1.14 |
| <b>Coefficient of variation</b> | 16%   | 32%   | 23%   | 11%  | 32%   | 28%    | 33%    | 35%    | 6%   | 32%  | 24%   | 22%  | 24%  | 11%   | 26%   | 99%  | 81%  | 100% | 53%  | 27%   | 79%   | 50%   | 74%  |

**Table S1c.** microbial parameters of soil samples.

|  |  |  |  |  |  |  |  |  |  |  |  |  |  |  |  |  |  |  |  |  |  |  |  |  |  |  |  |  |  |  |  |  |  |  |  |  |  |  |  |  |  |  |  |  |  |  |  |  |  |  |  |  |  |  |  |  |  |  |  |  |  |  |  |  |  |  |  |  |  |  |  |  |  |  |  |  |  |  |  |  |  |  |  |  |  |  |  |  |  |  |  |  |  |  |  |  |  |  |  |  |  |  |  |  |  |  |  |  |  |  |  |  |  |  |  |  |  |  |  |  |  |  |  |  |  |  |  |  |  |  |  |  |  |  |  |  |  |  |  |  |  |  |  |  |  |  |  |  |  |  |  |  |  |  |  |  |  |  |  |  |  |  |  |  |  |  |  |  |  |  |  |  |  |  |  |  |  |  |  |  |  |  |  |  |  |  |  |  |  |  |  |  |  |  |  |  |  |  |  |  |  |  |  |  |  |  |  |  |  |  |  |  |  |  |  |  |  |  |  |  |  |  |  |  |  |  |  |  |  |  |  |  |  |  |  |  |  |  |  |  |  |  |  |  |  |  |  |  |  |  |  |  |  |  |  |  |  |  |  |  |  |  |  |  |  |  |  |  |  |  |  |  |  |  |  |  |  |  |  |  |  |  |  |  |  |  |  |  |  |  |  |  |  |  |  |  |  |  |  |  |  |  |  |  |  |  |  |  |  |  |  |  |  |  |  |  |  |  |  |  |  |  |  |  |  |  |  |  |  |  |  |  |  |  |  |  |  |  |  |  |  |  |  |  |  |  |  |  |  |  |  |  |  |  |  |  |  |  |  |  |  |  |  |  |  |  |  |  |  |  |  |  |  |  |  |  |  |  |  |  |  |  |  |  |  |  |  |  |  |  |  |  |  |  |  |  |  |  |  |  |  |  |  |  |  |  |  |  |  |  |  |  |  |  |  |  |  |  |  |  |  |  |  |  |  |  |  |  |  |  |  |  |  |  |  |  |  |  |  |  |  |  |  |  |  |  |  |  |  |  |  |  |  |  |  |  |  |  |  |  |  |  |  |  |  |  |  |  |  |  |  |  |  |  |  |  |  |  |  |  |  |  |  |  |  |  |  |  |  |  |  |  |  |  |  |  |  |  |  |  |  |  |  |  |  |  |  |  |  |  |  |  |  |  |  |  |  |  |  |  |  |  |  |  |  |  |  |  |  |  |  |  |  |  |  |  |  |  |  |  |  |  |  |  |  |  |  |  |  |  |  |  |  |  |  |  |  |  |  |  |  |  |  |  |  |  |  |  |  |  |  |  |  |  |  |  |  |  |  |  |  |  |  |  |  |  |  |  |  |  |  |  |  |  |  |  |  |  |  |  |  |  |  |  |  |  |  |  |  |  |  |  |  |  |  |  |  |  |  |  |  |  |  |  |  |  |  |  |  |  |  |  |  |  |  |  |  |  |  |  |  |  |  |  |  |  |  |  |  |  |  |  |  |  |  |  |  |  |  |  |  |  |  |  |  |  |  |  |  |  |  |  |  |  |  |  |  |  |  |  |  |  |  |  |  |  |  |  |  |  |  |  |  |  |  |  |  |  |  |  |  |  |  |  |  |  |  |  |  |  |  |  |  |  |  |  |  |  |  |  |  |  |  |  |  |  |  |  |  |  |  |  |  |  |  |  |  |  |  |  |  |  |  |  |  |  |  |  |  |  |  |  |  |  |  |  |  |  |  |  |  |  |  |  |  |  |  |  |  |  |  |  |  |  |  |  |  |  |  |  |  |  |  |  |  |  |  |  |  |  |  |  |  |  |  |  |  |  |  |  |  |  |  |  |  |  |  |  |  |  |  |  |  |  |  |  |  |  |  |  |  |  |  |  |  |  |  |  |  |  |  |  |  |  |  |  |  |  |  |  |  |  |  |  |  |  |  |  |  |  |  |  |  |  |  |  |  |  |  |  |  |  |  |  |  |  |  |  |  |  |  |  |  |  |  |  |  |  |  |  |  |  |  |  |  |  |  |  |  |  |  |  |  |  |  |  |  |  |  |  |  |  |  |  |  |  |  |  |  |  |  |  |  |  |  |  |  |  |  |  |  |  |  |  |  |  |  |  |  |  |  |  |  |  |  |  |  |  |  |  |  |  |  |  |  |  |  |  |  |  |  |  |  |  |  |  |  |  |  |  |  |  |  |  |  |  |  |  |  |  |  |  |  |  |  |  |  |  |  |  |  |  |  |  |  |  |  |  |  |  |  |  |  |  |  |  |  |  |  |  |  |  |  |  |  |  |  |  |  |  |  |  |  |  |  |  |  |  |  |  |  |  |  |  |  |  |  |  |  |  |  |  |  |  |  |  |  |  |  |  |  |  |  |  |  |  |  |  |  |  |  |  |  |  |  |  |  |  |  |  |  |  |  |  |  |  |  |  |  |  |  |  |  |  |  |  |  |  |  |  |  |  |  |  |  |  |  |  |  |  |  |  |  |  |  |  |  |  |  |  |  |  |  |  |  |  |  |  |  |  |  |  |  |  |  |  |  |  |  |  |  |  |  |  |  |  |  |  |  |  |  |  |  |  |  |  |  |  |  |  |  |  |  |  |  |  |  |  |  |  |  |  |  |  |  |  |  |  |  |  |  |  |  |  |  |  |  |  |  |  |  |  |  |  |  |  |  |  |  |  |  |  |  |  |  |  |  |  |  |  |  |  |  |  |  |  |  |  |  |  |  |  |  |  |  |  |  |  |  |  |  |  |  |  |  |  |  |  |  |  |  |  |  |  |  |  |  |  |  |  |  |  |  |  |  |  |  |  |  |  |  |  |  |  |  |  |  |  |  |  |  |  |  |  |  |  |  |  |  |  |  |  |  |  |  |  |  |  |  |  |  |  |  |  |  |  |  |  |  |  |  |  |  |  |  |  |  |  |  |  |  |  |  |  |  |  |  |  |  |  |  |  |  |  |  |  |  |  |  |  |  |  |  |  |  |  |  |  |  |  |  |  |  |  |  |  |  |  |  |  |  |  |  |  |  |  |  |  |  |  |  |  |  |  |  |  |  |  |  |  |  |  |  |  |  |  |  |  |  |  |  |  |  |  |  |  |  |  |  |  |  |  |  |  |  |  |  |  |  |  |  |  |  |  |  |  |  |  |  |  |  |  |  |  |  |  |  |  |  |  |  |  |  |  |  |  |  |  |  |  |  |  |  |  |  |  |  |  |  |  |  |  |  |  |  |  |  |  |  |  |  |  |  |  |  |  |  |  |  |  |  |  |  |  |  |  |  |  |  |  |  |  |  |  |  |  |  |  |  |  |  |  |  |  |  |  |  |  |  |  |  |  |  |  |  |  |  |  |  |  |  |  |  |  |  |  |  |  |  |  |  |  |  |  |  |  |  |  |  |  |  |  |  |  |  |  |  |  |  |  |  |  |  |  |  |  |  |  |  |  |  |  |  |  |  |  |  |  |  |  |  |  |  |  |  |  |  |  |  |  |  |  |  |  |  |  |  |  |  |  |  |  |  |  |  |  |  |  |  |  |  |  |  |  |  |  |  |  |  |  |  |  |  |  |  |  |  |  |  |  |  |  |  |  |  |  |  |  |  |  |  |  |  |  |  |  |  |  |  |  |  |  |  |  |  |  |  |  |  |  |  |  |  |  |  |  |  |  |  |  |  |  |  |  |  |  |  |  |  |  |  |  |  |  |
|--|--|--|--|--|--|--|--|--|--|--|--|--|--|--|--|--|--|--|--|--|--|--|--|--|--|--|--|--|--|--|--|--|--|--|--|--|--|--|--|--|--|--|--|--|--|--|--|--|--|--|--|--|--|--|--|--|--|--|--|--|--|--|--|--|--|--|--|--|--|--|--|--|--|--|--|--|--|--|--|--|--|--|--|--|--|--|--|--|--|--|--|--|--|--|--|--|--|--|--|--|--|--|--|--|--|--|--|--|--|--|--|--|--|--|--|--|--|--|--|--|--|--|--|--|--|--|--|--|--|--|--|--|--|--|--|--|--|--|--|--|--|--|--|--|--|--|--|--|--|--|--|--|--|--|--|--|--|--|--|--|--|--|--|--|--|--|--|--|--|--|--|--|--|--|--|--|--|--|--|--|--|--|--|--|--|--|--|--|--|--|--|--|--|--|--|--|--|--|--|--|--|--|--|--|--|--|--|--|--|--|--|--|--|--|--|--|--|--|--|--|--|--|--|--|--|--|--|--|--|--|--|--|--|--|--|--|--|--|--|--|--|--|--|--|--|--|--|--|--|--|--|--|--|--|--|--|--|--|--|--|--|--|--|--|--|--|--|--|--|--|--|--|--|--|--|--|--|--|--|--|--|--|--|--|--|--|--|--|--|--|--|--|--|--|--|--|--|--|--|--|--|--|--|--|--|--|--|--|--|--|--|--|--|--|--|--|--|--|--|--|--|--|--|--|--|--|--|--|--|--|--|--|--|--|--|--|--|--|--|--|--|--|--|--|--|--|--|--|--|--|--|--|--|--|--|--|--|--|--|--|--|--|--|--|--|--|--|--|--|--|--|--|--|--|--|--|--|--|--|--|--|--|--|--|--|--|--|--|--|--|--|--|--|--|--|--|--|--|--|--|--|--|--|--|--|--|--|--|--|--|--|--|--|--|--|--|--|--|--|--|--|--|--|--|--|--|--|--|--|--|--|--|--|--|--|--|--|--|--|--|--|--|--|--|--|--|--|--|--|--|--|--|--|--|--|--|--|--|--|--|--|--|--|--|--|--|--|--|--|--|--|--|--|--|--|--|--|--|--|--|--|--|--|--|--|--|--|--|--|--|--|--|--|--|--|--|--|--|--|--|--|--|--|--|--|--|--|--|--|--|--|--|--|--|--|--|--|--|--|--|--|--|--|--|--|--|--|--|--|--|--|--|--|--|--|--|--|--|--|--|--|--|--|--|--|--|--|--|--|--|--|--|--|--|--|--|--|--|--|--|--|--|--|--|--|--|--|--|--|--|--|--|--|--|--|--|--|--|--|--|--|--|--|--|--|--|--|--|--|--|--|--|--|--|--|--|--|--|--|--|--|--|--|--|--|--|--|--|--|--|--|--|--|--|--|--|--|--|--|--|--|--|--|--|--|--|--|--|--|--|--|--|--|--|--|--|--|--|--|--|--|--|--|--|--|--|--|--|--|--|--|--|--|--|--|--|--|--|--|--|--|--|--|--|--|--|--|--|--|--|--|--|--|--|--|--|--|--|--|--|--|--|--|--|--|--|--|--|--|--|--|--|--|--|--|--|--|--|--|--|--|--|--|--|--|--|--|--|--|--|--|--|--|--|--|--|--|--|--|--|--|--|--|--|--|--|--|--|--|--|--|--|--|--|--|--|--|--|--|--|--|--|--|--|--|--|--|--|--|--|--|--|--|--|--|--|--|--|--|--|--|--|--|--|--|--|--|--|--|--|--|--|--|--|--|--|--|--|--|--|--|--|--|--|--|--|--|--|--|--|--|--|--|--|--|--|--|--|--|--|--|--|--|--|--|--|--|--|--|--|--|--|--|--|--|--|--|--|--|--|--|--|--|--|--|--|--|--|--|--|--|--|--|--|--|--|--|--|--|--|--|--|--|--|--|--|--|--|--|--|--|--|--|--|--|--|--|--|--|--|--|--|--|--|--|--|--|--|--|--|--|--|--|--|--|--|--|--|--|--|--|--|--|--|--|--|--|--|--|--|--|--|--|--|--|--|--|--|--|--|--|--|--|--|--|--|--|--|--|--|--|--|--|--|--|--|--|--|--|--|--|--|--|--|--|--|--|--|--|--|--|--|--|--|--|--|--|--|--|--|--|--|--|--|--|--|--|--|--|--|--|--|--|--|--|--|--|--|--|--|--|--|--|--|--|--|--|--|--|--|--|--|--|--|--|--|--|--|--|--|--|--|--|--|--|--|--|--|--|--|--|--|--|--|--|--|--|--|--|--|--|--|--|--|--|--|--|--|--|--|--|--|--|--|--|--|--|--|--|--|--|--|--|--|--|--|--|--|--|--|--|--|--|--|--|--|--|--|--|--|--|--|--|--|--|--|--|--|--|--|--|--|--|--|--|--|--|--|--|--|--|--|--|--|--|--|--|--|--|--|--|--|--|--|--|--|--|--|--|--|--|--|--|--|--|--|--|--|--|--|--|--|--|--|--|--|--|--|--|--|--|--|--|--|--|--|--|--|--|--|--|--|--|--|--|--|--|--|--|--|--|--|--|--|--|--|--|--|--|--|--|--|--|--|--|--|--|--|--|--|--|--|--|--|--|--|--|--|--|--|--|--|--|--|--|--|--|--|--|--|--|--|--|--|--|--|--|--|--|--|--|--|--|--|--|--|--|--|--|--|--|--|--|--|--|--|--|--|--|--|--|--|--|--|--|--|--|--|--|--|--|--|--|--|--|--|--|--|--|--|--|--|--|--|--|--|--|--|--|--|--|--|--|--|--|--|--|--|--|--|--|--|--|--|--|--|--|--|--|--|--|--|--|--|--|--|--|--|--|--|--|--|--|--|--|--|--|--|--|--|--|--|--|--|--|--|--|--|--|--|--|--|--|--|--|--|--|--|--|--|--|--|--|--|--|--|--|--|--|--|--|--|--|--|--|--|--|--|--|--|--|--|--|--|--|--|--|--|--|--|--|--|--|--|--|--|--|--|--|--|--|--|--|--|--|--|--|--|--|--|--|--|--|--|--|--|--|--|--|--|--|--|--|--|--|--|--|--|--|--|--|--|--|--|--|--|--|--|--|--|--|--|--|--|--|--|--|--|--|--|--|--|--|--|--|--|--|--|--|--|--|--|--|--|--|--|--|--|--|--|--|--|--|--|--|--|--|--|--|--|--|--|--|--|--|--|--|--|--|--|--|--|--|--|--|--|--|--|--|--|--|--|--|--|--|--|--|--|--|--|--|--|--|--|--|--|--|--|--|--|--|--|--|--|--|--|--|--|--|--|--|--|--|--|--|--|--|--|--|--|--|--|--|--|--|--|--|--|--|--|--|--|--|--|--|--|--|--|--|--|--|--|--|--|--|--|--|--|--|--|--|--|--|--|--|--|--|--|--|--|--|--|--|--|--|--|--|--|--|--|--|--|--|--|--|--|--|--|--|--|--|--|--|--|--|--|--|--|--|--|--|--|--|--|--|--|--|--|--|--|--|--|--|--|--|--|--|--|--|--|--|--|--|--|--|--|--|--|--|--|--|--|--|--|--|--|--|--|--|--|--|--|--|--|--|--|--|--|--|--|--|--|--|--|--|--|--|--|--|--|--|--|--|--|--|--|--|--|--|--|--|--|--|--|--|--|--|--|--|--|--|--|--|--|--|--|--|--|--|--|--|--|--|--|--|--|--|--|--|--|--|--|--|--|
|  |  |  |  |  |  |  |  |  |  |  |  |  |  |  |  |  |  |  |  |  |  |  |  |  |  |  |  |  |  |  |  |  |  |  |  |  |  |  |  |  |  |  |  |  |  |  |  |  |  |  |  |  |  |  |  |  |  |  |  |  |  |  |  |  |  |  |  |  |  |  |  |  |  |  |  |  |  |  |  |  |  |  |  |  |  |  |  |  |  |  |  |  |  |  |  |  |  |  |  |  |  |  |  |  |  |  |  |  |  |  |  |  |  |  |  |  |  |  |  |  |  |  |  |  |  |  |  |  |  |  |  |  |  |  |  |  |  |  |  |  |  |  |  |  |  |  |  |  |  |  |  |  |  |  |  |  |  |  |  |  |  |  |  |  |  |  |  |  |  |  |  |  |  |  |  |  |  |  |  |  |  |  |  |  |  |  |  |  |  |  |  |  |  |  |  |  |  |  |  |  |  |  |  |  |  |  |  |  |  |  |  |  |  |  |  |  |  |  |  |  |  |  |  |  |  |  |  |  |  |  |  |  |  |  |  |  |  |  |  |  |  |  |  |  |  |  |  |  |  |  |  |  |  |  |  |  |  |  |  |  |  |  |  |  |  |  |  |  |  |  |  |  |  |  |  |  |  |  |  |  |  |  |  |  |  |  |  |  |  |  |  |  |  |  |  |  |  |  |  |  |  |  |  |  |  |  |  |  |  |  |  |  |  |  |  |  |  |  |  |  |  |  |  |  |  |  |  |  |  |  |  |  |  |  |  |  |  |  |  |  |  |  |  |  |  |  |  |  |  |  |  |  |  |  |  |  |  |  |  |  |  |  |  |  |  |  |  |  |  |  |  |  |  |  |  |  |  |  |  |  |  |  |  |  |  |  |  |  |  |  |  |  |  |  |  |  |  |  |  |  |  |  |  |  |  |  |  |  |  |  |  |  |  |  |  |  |  |  |  |  |  |  |  |  |  |  |  |  |  |  |  |  |  |  |  |  |  |  |  |  |  |  |  |  |  |  |  |  |  |  |  |  |  |  |  |  |  |  |  |  |  |  |  |  |  |  |  |  |  |  |  |  |  |  |  |  |  |  |  |  |  |  |  |  |  |  |  |  |  |  |  |  |  |  |  |  |  |  |  |  |  |  |  |  |  |  |  |  |  |  |  |  |  |  |  |  |  |  |  |  |  |  |  |  |  |  |  |  |  |  |  |  |  |  |  |  |  |  |  |  |  |  |  |  |  |  |  |  |  |  |  |  |  |  |  |  |  |  |  |  |  |  |  |  |  |  |  |  |  |  |  |  |  |  |  |  |  |  |  |  |  |  |  |  |  |  |  |  |  |  |  |  |  |  |  |  |  |  |  |  |  |  |  |  |  |  |  |  |  |  |  |  |  |  |  |  |  |  |  |  |  |  |  |  |  |  |  |  |  |  |  |  |  |  |  |  |  |  |  |  |  |  |  |  |  |  |  |  |  |  |  |  |  |  |  |  |  |  |  |  |  |  |  |  |  |  |  |  |  |  |  |  |  |  |  |  |  |  |  |  |  |  |  |  |  |  |  |  |  |  |  |  |  |  |  |  |  |  |  |  |  |  |  |  |  |  |  |  |  |  |  |  |  |  |  |  |  |  |  |  |  |  |  |  |  |  |  |  |  |  |  |  |  |  |  |  |  |  |  |  |  |  |  |  |  |  |  |  |  |  |  |  |  |  |  |  |  |  |  |  |  |  |  |  |  |  |  |  |  |  |  |  |  |  |  |  |  |  |  |  |  |  |  |  |  |  |  |  |  |  |  |  |  |  |  |  |  |  |  |  |  |  |  |  |  |  |  |  |  |  |  |  |  |  |  |  |  |  |  |  |  |  |  |  |  |  |  |  |  |  |  |  |  |  |  |  |  |  |  |  |  |  |  |  |  |  |  |  |  |  |  |  |  |  |  |  |  |  |  |  |  |  |  |  |  |  |  |  |  |  |  |  |  |  |  |  |  |  |  |  |  |  |  |  |  |  |  |  |  |  |  |  |  |  |  |  |  |  |  |  |  |  |  |  |  |  |  |  |  |  |  |  |  |  |  |  |  |  |  |  |  |  |  |  |  |  |  |  |  |  |  |  |  |  |  |  |  |  |  |  |  |  |  |  |  |  |  |  |  |  |  |  |  |  |  |  |  |  |  |  |  |  |  |  |  |  |  |  |  |  |  |  |  |  |  |  |  |  |  |  |  |  |  |  |  |  |  |  |  |  |  |  |  |  |  |  |  |  |  |  |  |  |  |  |  |  |  |  |  |  |  |  |  |  |  |  |  |  |  |  |  |  |  |  |  |  |  |  |  |  |  |  |  |  |  |  |  |  |  |  |  |  |  |  |  |  |  |  |  |  |  |  |  |  |  |  |  |  |  |  |  |  |  |  |  |  |  |  |  |  |  |  |  |  |  |  |  |  |  |  |  |  |  |  |  |  |  |  |  |  |  |  |  |  |  |  |  |  |  |  |  |  |  |  |  |  |  |  |  |  |  |  |  |  |  |  |  |  |  |  |  |  |  |  |  |  |  |  |  |  |  |  |  |  |  |  |  |  |  |  |  |  |  |  |  |  |  |  |  |  |  |  |  |  |  |  |  |  |  |  |  |  |  |  |  |  |  |  |  |  |  |  |  |  |  |  |  |  |  |  |  |  |  |  |  |  |  |  |  |  |  |  |  |  |  |  |  |  |  |  |  |  |  |  |  |  |  |  |  |  |  |  |  |  |  |  |  |  |  |  |  |  |  |  |  |  |  |  |  |  |  |  |  |  |  |  |  |  |  |  |  |  |  |  |  |  |  |  |  |  |  |  |  |  |  |  |  |  |  |  |  |  |  |  |  |  |  |  |  |  |  |  |  |  |  |  |  |  |  |  |  |  |  |  |  |  |  |  |  |  |  |  |  |  |  |  |  |  |  |  |  |  |  |  |  |  |  |  |  |  |  |  |  |  |  |  |  |  |  |  |  |  |  |  |  |  |  |  |  |  |  |  |  |  |  |  |  |  |  |  |  |  |  |  |  |  |  |  |  |  |  |  |  |  |  |  |  |  |  |  |  |  |  |  |  |  |  |  |  |  |  |  |  |  |  |  |  |  |  |  |  |  |  |  |  |  |  |  |  |  |  |  |  |  |  |  |  |  |  |  |  |  |  |  |  |  |  |  |  |  |  |  |  |  |  |  |  |  |  |  |  |  |  |  |  |  |  |  |  |  |  |  |  |  |  |  |  |  |  |  |  |  |  |  |  |  |  |  |  |  |  |  |  |  |  |  |  |  |  |  |  |  |  |  |  |  |  |  |  |  |  |  |  |  |  |  |  |  |  |  |  |  |  |  |  |  |  |  |  |  |  |  |  |  |  |  |  |  |  |  |  |  |  |  |  |  |  |  |  |  |  |  |  |  |  |  |  |  |  |  |  |  |  |  |  |  |  |  |  |  |  |  |  |  |  |  |  |  |  |  |  |  |  |  |  |  |  |  |  |  |  |  |  |  |  |  |  |  |  |  |  |  |  |  |  |  |  |  |  |  |  |  |  |  |  |  |  |  |  |  |  |  |  |  |  |  |  |  |  |  |  |  |  |  |  |  |  |  |  |  |  |  |  |  |  |  |  |  |  |  |  |  |  |  |  |  |  |  |  |  |  |  |  |  |  |  |  |  |  |  |  |  |  |  |
|--|--|--|--|--|--|--|--|--|--|--|--|--|--|--|--|--|--|--|--|--|--|--|--|--|--|--|--|--|--|--|--|--|--|--|--|--|--|--|--|--|--|--|--|--|--|--|--|--|--|--|--|--|--|--|--|--|--|--|--|--|--|--|--|--|--|--|--|--|--|--|--|--|--|--|--|--|--|--|--|--|--|--|--|--|--|--|--|--|--|--|--|--|--|--|--|--|--|--|--|--|--|--|--|--|--|--|--|--|--|--|--|--|--|--|--|--|--|--|--|--|--|--|--|--|--|--|--|--|--|--|--|--|--|--|--|--|--|--|--|--|--|--|--|--|--|--|--|--|--|--|--|--|--|--|--|--|--|--|--|--|--|--|--|--|--|--|--|--|--|--|--|--|--|--|--|--|--|--|--|--|--|--|--|--|--|--|--|--|--|--|--|--|--|--|--|--|--|--|--|--|--|--|--|--|--|--|--|--|--|--|--|--|--|--|--|--|--|--|--|--|--|--|--|--|--|--|--|--|--|--|--|--|--|--|--|--|--|--|--|--|--|--|--|--|--|--|--|--|--|--|--|--|--|--|--|--|--|--|--|--|--|--|--|--|--|--|--|--|--|--|--|--|--|--|--|--|--|--|--|--|--|--|--|--|--|--|--|--|--|--|--|--|--|--|--|--|--|--|--|--|--|--|--|--|--|--|--|--|--|--|--|--|--|--|--|--|--|--|--|--|--|--|--|--|--|--|--|--|--|--|--|--|--|--|--|--|--|--|--|--|--|--|--|--|--|--|--|--|--|--|--|--|--|--|--|--|--|--|--|--|--|--|--|--|--|--|--|--|--|--|--|--|--|--|--|--|--|--|--|--|--|--|--|--|--|--|--|--|--|--|--|--|--|--|--|--|--|--|--|--|--|--|--|--|--|--|--|--|--|--|--|--|--|--|--|--|--|--|--|--|--|--|--|--|--|--|--|--|--|--|--|--|--|--|--|--|--|--|--|--|--|--|--|--|--|--|--|--|--|--|--|--|--|--|--|--|--|--|--|--|--|--|--|--|--|--|--|--|--|--|--|--|--|--|--|--|--|--|--|--|--|--|--|--|--|--|--|--|--|--|--|--|--|--|--|--|--|--|--|--|--|--|--|--|--|--|--|--|--|--|--|--|--|--|--|--|--|--|--|--|--|--|--|--|--|--|--|--|--|--|--|--|--|--|--|--|--|--|--|--|--|--|--|--|--|--|--|--|--|--|--|--|--|--|--|--|--|--|--|--|--|--|--|--|--|--|--|--|--|--|--|--|--|--|--|--|--|--|--|--|--|--|--|--|--|--|--|--|--|--|--|--|--|--|--|--|--|--|--|--|--|--|--|--|--|--|--|--|--|--|--|--|--|--|--|--|--|--|--|--|--|--|--|--|--|--|--|--|--|--|--|--|--|--|--|--|--|--|--|--|--|--|--|--|--|--|--|--|--|--|--|--|--|--|--|--|--|--|--|--|--|--|--|--|--|--|--|--|--|--|--|--|--|--|--|--|--|--|--|--|--|--|--|--|--|--|--|--|--|--|--|--|--|--|--|--|--|--|--|--|--|--|--|--|--|--|--|--|--|--|--|--|--|--|--|--|--|--|--|--|--|--|--|--|--|--|--|--|--|--|--|--|--|--|--|--|--|--|--|--|--|--|--|--|--|--|--|--|--|--|--|--|--|--|--|--|--|--|--|--|--|--|--|--|--|--|--|--|--|--|--|--|--|--|--|--|--|--|--|--|--|--|--|--|--|--|--|--|--|--|--|--|--|--|--|--|--|--|--|--|--|--|--|--|--|--|--|--|--|--|--|--|--|--|--|--|--|--|--|--|--|--|--|--|--|--|--|--|--|--|--|--|--|--|--|--|--|--|--|--|--|--|--|--|--|--|--|--|--|--|--|--|--|--|--|--|--|--|--|--|--|--|--|--|--|--|--|--|--|--|--|--|--|--|--|--|--|--|--|--|--|--|--|--|--|--|--|--|--|--|--|--|--|--|--|--|--|--|--|--|--|--|--|--|--|--|--|--|--|--|--|--|--|--|--|--|--|--|--|--|--|--|--|--|--|--|--|--|--|--|--|--|--|--|--|--|--|--|--|--|--|--|--|--|--|--|--|--|--|--|--|--|--|--|--|--|--|--|--|--|--|--|--|--|--|--|--|--|--|--|--|--|--|--|--|--|--|--|--|--|--|--|--|--|--|--|--|--|--|--|--|--|--|--|--|--|--|--|--|--|--|--|--|--|--|--|--|--|--|--|--|--|--|--|--|--|--|--|--|--|--|--|--|--|--|--|--|--|--|--|--|--|--|--|--|--|--|--|--|--|--|--|--|--|--|--|--|--|--|--|--|--|--|--|--|--|--|--|--|--|--|--|--|--|--|--|--|--|--|--|--|--|--|--|--|--|--|--|--|--|--|--|--|--|--|--|--|--|--|--|--|--|--|--|--|--|--|--|--|--|--|--|--|--|--|--|--|--|--|--|--|--|--|--|--|--|--|--|--|--|--|--|--|--|--|--|--|--|--|--|--|--|--|--|--|--|--|--|--|--|--|--|--|--|--|--|--|--|--|--|--|--|--|--|--|--|--|--|--|--|--|--|--|--|--|--|--|--|--|--|--|--|--|--|--|--|--|--|--|--|--|--|--|--|--|--|--|--|--|--|--|--|--|--|--|--|--|--|--|--|--|--|--|--|--|--|--|--|--|--|--|--|--|--|--|--|--|--|--|--|--|--|--|--|--|--|--|--|--|--|--|--|--|--|--|--|--|--|--|--|--|--|--|--|--|--|--|--|--|--|--|--|--|--|--|--|--|--|--|--|--|--|--|--|--|--|--|--|--|--|--|--|--|--|--|--|--|--|--|--|--|--|--|--|--|--|--|--|--|--|--|--|--|--|--|--|--|--|--|--|--|--|--|--|--|--|--|--|--|--|--|--|--|--|--|--|--|--|--|--|--|--|--|--|--|--|--|--|--|--|--|--|--|--|--|--|--|--|--|--|--|--|--|--|--|--|--|--|--|--|--|--|--|--|--|--|--|--|--|--|--|--|--|--|--|--|--|--|--|--|--|--|--|--|--|--|--|--|--|--|--|--|--|--|--|--|--|--|--|--|--|--|--|--|--|--|--|--|--|--|--|--|--|--|--|--|--|--|--|--|--|--|--|--|--|--|--|--|--|--|--|--|--|--|--|--|--|--|--|--|--|--|--|--|--|--|--|--|--|--|--|--|--|--|--|--|--|--|--|--|--|--|--|--|--|--|--|--|--|--|--|--|--|--|--|--|--|--|--|--|--|--|--|--|--|--|--|--|--|--|--|--|--|--|--|--|--|--|--|--|--|--|--|--|--|--|--|--|--|--|--|--|--|--|--|--|--|--|--|--|--|--|--|--|--|--|--|--|--|--|--|--|--|--|--|--|--|--|--|--|--|--|--|--|--|--|--|--|--|--|--|--|--|--|--|--|--|--|--|--|--|--|--|--|--|--|--|--|--|--|--|--|--|--|--|--|--|--|--|--|--|--|--|--|--|--|--|--|--|--|--|--|--|--|--|--|--|--|--|--|--|--|--|--|--|--|--|--|--|--|--|--|--|--|--|--|--|--|--|--|--|--|--|--|--|--|--|--|--|--|--|--|--|--|--|--|--|--|--|--|--|--|--|--|

|     |                                  |                                      |                                                       |                                  |                                |                                                             |                                            |                    |              |                                                                                                                                                                                                                                                                                                                                                                                                                        |
|-----|----------------------------------|--------------------------------------|-------------------------------------------------------|----------------------------------|--------------------------------|-------------------------------------------------------------|--------------------------------------------|--------------------|--------------|------------------------------------------------------------------------------------------------------------------------------------------------------------------------------------------------------------------------------------------------------------------------------------------------------------------------------------------------------------------------------------------------------------------------|
| PA1 | 1 2 1.5.4<br>1 0.6 3<br>3 7 1 9  | 0.1<br>1 7 0 6<br>6 4 1 4<br>9 3 0 7 | 3 2 1<br>0 3 2<br>6 6 3 2 2<br>6 9 8 7 8<br>6 6 4 1 8 | 12 5<br>3 1 2<br>2 2 5           | 8 2<br>2 2 5<br>5 8            | 107438721232298584856032<br>59 5 3 5 6 6686 7 2 3 6 8       | 40 1 8<br>4126662613<br>7548 3 9 6         | 16<br>97 0         | 13<br>9441 8 | 17149 62 333 84 85 18 99 35 37 57 19 44 3 24 35 16 30 22 79 1 12 13 11 6 9 8 9 6<br>10 12 3 9 2 6 7 15 5 7 0 1 5 9 21 1 1 3 5 4 8 1 4 0 0 2 2 6 1 3 0 9 36 2377 1264 1544<br>936 518 68 68 40 110 150 157 118 28 30 390 154 107 66 8 20 46 99 107 42 1 50 2<br>46 3 12 8 25 84 69 10 633 3 8 21 0 38 46 24 16 20 19 6 16 16 10 12 41 48 30 2 43<br>7 1 25 4 13 16 5 18 29 14 2 21 8 8 1 12 10 16 4 360                 |
| PA2 | 6 1 1.4.5<br>2 5.5.3<br>1 9 8    | 0.1<br>1 7 1 6<br>5 2 0 6<br>9 7 5 2 | 2 3 1<br>5 1 3<br>6 7 5 9<br>3 1 3 2 6                | 12 24<br>3 3 1<br>1 1 9          | 3 3<br>1 1 9<br>1 2            | 93485053112027218981418810<br>2 7 6 2 3 192533 5 9 8 5 0    | 0 6<br>39356530131710<br>1107 1 6 0 1 2    | 49 19<br>5 12      | 15<br>5      | 8310 38 62 43 146 18 58 33 16 69 17 50 7 15 26 15 15 10 25 5 31 8 18 8 8 17 6 2<br>28 7 1 9 3 5 2 12 2 5 1 4 6 6 9 2 4 2 3 4 2 0 4 2 0 6 2 0 1 1 2 31 1930 2231 845<br>869 403 196 563 201 37 65 16 68 31 10 13 69 65 83 12 21 21 23 125 24 2 596 4 58<br>21 4 80 52 57 103 95 29 9 3 17 37 0 53 47 4 22 31 18 46 15 13 7 10 27 23 17 11 3<br>19 0 2 23 77 37 8 31 8 1 16 8 11 2 8 12 1 24 3 290                       |
| PA3 | 5 1 4.3.<br>3 0.2.8 9<br>6 8 6 5 | 0.1<br>1 7 2 6<br>3 7 5 9<br>7 2 0 8 | 2 2 1 1<br>3 7 1 0<br>0 2 8 3<br>4 0 2 4              | 6 5 2 5<br>8 1 8 2 57<br>9 7 5 7 | 15 7<br>2 5 0 11<br>2          | 883533601140205711774894<br>8 5 6 6 9 0679 0 45 0 2 2       | 5 0 1<br>38291042131012<br>166630 6 1 2 2  | 8036<br>2          | 16<br>2      | 10927 99 40 51 87 8 81 19 39 70 10 41 3 19 58 16 16 8 21 0 5 4 16 26 14 11 9 19<br>14 12 1 9 2 3 7 12 5 3 0 2 5 3 4 3 2 8 10 6 6 0 8 1 0 1 6 5 0 4 5 15 38 2912 631 836<br>825 310 142 226 58 118 133 76 113 139 10 91 102 190 124 64 95 81 78 322 197 2<br>45 7 83 56 29 5 196 157 35 43 12 16 3 20 16 54 141 1 16 5 20 15 309 31 71 1 9 13<br>36 42 21 4 2 0 2 42 2 8 13 3 6 9 12 31 14 12 7 8 18 6 15 415           |
| PA5 | 2 6 1.4.<br>4 0.6.5<br>6 7 2     | 0.1<br>1 6 4 6<br>5 3 0 7<br>2 7 7 0 | 3 3 8<br>0 9 7 7<br>0 0 2 1                           | 8 6 6 1<br>7 7 3 9<br>2 7 7 9    | 7 2 39<br>1 9 15<br>5 0 0 0    | 14263187<br>86 9 3 8 57<br>34233012166316<br>208387 1 9 7 0 | 21 2 0<br>33446718162911<br>1514 1 6 3 9 2 | 20 3 97<br>20 3 97 |              | 240 154 9 0 94 8 16 2 71 39 8 43 0 10 22 14 7 10 47 0 0 2 5 4 2 0 8 3 8 4 0 2 0 0 2 4<br>2 0 0 0 1 4 0 10 0 0 19 2 0 0 0 0 0 1 0 21 0 1 14 0 23 793 3150 471 188 20 352 122<br>877 95 24 1 31 38 8 32 47 12 118 260 1299 8 144 0 1 2 54 3 27 408 319 2 17 16 8<br>105 150 2 4 136 2 1 11 3 14 1 3 7 3 4 3 0 27 7 54 37 3 1 45 13 0 1 19 3 0 2 6 8 10 6<br>2 19 3 7 2 1 8 330                                           |
| PA5 | 7 1 3.4.<br>5 7.7 3 5<br>8 7 9 6 | 0.1<br>1 7 0 6<br>3 0 7 8<br>6 2 1 8 | 2 1 5<br>9 6 0 1<br>5 9 6 0<br>1 9 1 0                | 9 2 8<br>1 0 9<br>5 3 4          | 42 86<br>3 5 2<br>36 4         | 785552529<br>4 7 6 5 88<br>38241552683659<br>128219 2 6 6 7 | 14 0 2<br>50776058<br>56 7 5 5 988550      | 1339<br>7 0        | 9            | 60216 6 92 115 21 200 84 201 8 26 27 19 28 234 32 15 40 14 9 24 53 32 9 9 12 36<br>28 49 13 7 32 5 15 12 7 9 8 24 13 8 9 19 4 0 14 8 3 5 23 42 7 5 22 1 3 3 11 1 0 0<br>176 2109 1617 573 695 539 65 280 27 140 156 28 60 473 37 50 110 83 114 29 22<br>44 40 97 126 3 8 829 29 6 3 4 10 94 28 51 332 23 7 36 48 72 56 66 16 8 33 17 1 7<br>17 0 13 99 13 11 6 33 7 1 0 18 8 13 30 3 6 1 7 26 2 27 3 6 4 5 13 334      |
| PA0 | 1 1 1.7.<br>6 4.1 0 9<br>9 8 6 9 | 0.1<br>1 7 2 6<br>9 0 7 8<br>5 7 7 8 | 3 1 1<br>1 3 2<br>4 6 9<br>5 3 5                      | 6 7 1<br>3 8 4<br>0 8 1<br>5 3 4 | 2 7 16<br>22 4 1 2<br>24 8 9 3 | 89805573153715157594933717<br>5 9 4 2 5 670438 9 5 0 0 7    | 2 8<br>4317608119<br>5186 5 4 5 91         | 1414<br>4 7        | 5227         | 88218 31 84 49 70 130 128 62 12 75 35 26 51 12 26 31 37 34 59 3 18 41 47 9 14 24<br>14 6 20 20 5 12 11 12 29 14 10 5 4 6 6 4 25 2 12 10 6 8 4 5 11 5 4 2 10 3 2 4 1 9 73<br>2130 1723 283 987 761 369 201 70 83 139 109 166 82 55 41 94 198 59 37 43 58 66<br>16 73 0 72 9 69 5 1 205 10 50 47 16 3 31 8 4 13 412 23 44 3 35 64 22 2 18 6 107 34<br>8 17 23 58 5 5 3 11 30 37 13 10 17 1 23 34 22 1 11 3 9 18 31 6 482 |
| PA7 | 6 1 1.3.<br>7 4.7 9 7<br>1 1 6 4 | 10.<br>2                             |                                                       |                                  |                                |                                                             |                                            |                    |              |                                                                                                                                                                                                                                                                                                                                                                                                                        |

6

|    |                                           |                                                |                                                                                       |
|----|-------------------------------------------|------------------------------------------------|---------------------------------------------------------------------------------------|
|    | 5 4                                       |                                                | 62 38 29 5 26 50 16 8 17 15 22 13 10 14 26 9 15 6 17 7 21 14 25 41 2 1 14 11 3 4      |
|    | 9 7                                       |                                                | 378                                                                                   |
|    | 0 1 0 2 1 4 1 1 3 2                       |                                                | 279 0 85 45 15 198 83 20 3 37 84 21 83 26 44 28 21 17 11 180 18 5 44 20 19 23 36      |
| PS | 8 2 2 3 6 3 8 8 4 0 3 1 3 2               |                                                | 3 14 4 25 4 10 11 11 1 7 10 1 3 4 2 13 0 28 5 0 6 5 16 5 23 16 23 5 2 1 6 0 0 193     |
| 9  | 4 6 9 2 9 7 6 4 8 9 4 3 4 5 1 4           | 49 44 27 47 20 33 27 12 11 79 30 32            | 2952 1312 979 829 552 88 144 6 93 98 125 95 30 298 24 247 121 71 23 68 47 175         |
|    | 8 2 7 3 2 8 7 9 0 9 9 8 6 7 4             | 9 5 0 5 0 76 94 35 24 7 7 7 30 4 6 60 75 41 82 | 74 169 4 25 11 52 20 3 24 12 20 57 78 2 51 6 35 25 14 13 0 5 25 60 9 7 25 19 16 19    |
|    |                                           |                                                | 6 11 13 24 22 10 84 32 1 17 7 18 6 11 15 16 14 0 9 2 45 19 17 9 351                   |
|    | 0 0                                       |                                                | 9916 74 116 31 76 28 62 41 49 71 21 21 7 28 19 9 31 32 82 0 10 1 9 1 4 12 6 5 10 9    |
| PS | 1 5 1 7 7 4 2 3 1 5 5 3 2 2 3             | 83 45 41 79 24 22 13 67 65 60 50               | 0 9 1 0 2 2 8 4 1 3 9 4 3 9 1 9 4 1 5 0 6 1 1 5 0 1 0 3 0 7 101 2221 1406 520 668 280 |
| 10 | 5 9 4 8 3 8 7 1 9 1 4 6 0 7 1 9           | 9 3 5 2 91 91 97 50 1 2 9 4 16 16 1            | 144 179 15 21 58 214 91 131 671 122 55 116 253 24 30 136 105 167 50 1 22 2 29 3       |
|    | 9 4 0 4 5                                 |                                                | 5 24 7 51 47 27 9 21 2 50 24 31 44 1 5 13 43 6 7 10 5 17 3 3 30 12 14 5 12 14 19 5    |
|    |                                           |                                                | 11 2 6 13 2 15 1 13 25 0 7 2 27 10 0 174                                              |
|    | 0 0                                       |                                                | 10111 46 49 114 112 9 21 29 70 57 12 24 0 20 33 16 13 7 26 16 16 17 11 5 10 4 6       |
| PS | 8 1 4 6 9 5 0 7 5 2 2 1 8 7 3 2 4         | 86 30 47 54 31 26 86 81 84 49 11               | 35 11 10 2 14 1 0 0 25 10 17 1 1 19 1 4 2 0 8 14 3 3 0 3 0 0 1 1 1 0 0 1 0 60 2325    |
| 11 | 3 2 4 6 1 7 7 0 6 8 5 6 1 5 7 6 9         | 4 4 5 6 93 53 89 5 2 7 7 14 18 1 4             | 930 267 897 280 169 493 351 88 161 17 102 304 101 17 231 81 266 6 54 18 78 394        |
|    | 8 6 2 4 2 5 4 5 1                         |                                                | 244 167 177 97 74 5 95 72 22 97 33 14 18 30 6 40 18 6 72 151 27 13 6 49 35 12 6       |
|    |                                           |                                                | 16 13 67 11 15 64 0 4 2 3 149 6 40 4 1 12 7 10 10 2 7 16 8 5 8 4 310                  |
|    | 0 0                                       |                                                | 1414 153 19 0 169 4 13 23 63 61 2 61 2 6 14 9 11 1 13 0 6 10 4 3 3 0 7 6 5 5 1 32 1   |
| PS | 2 3 2 5 1 7 7 6 7 9 1 1 8 2 2 4           | 14 17 45 55 39 12 37 23 20 18 44               | 0 1 7 8 1 0 1 7 6 0 7 2 2 8 6 3 0 2 0 0 2 0 3 0 3 2 0 51 1809 3891 58 219 31 60 392   |
| 12 | 4 8 9 3 1 0 6 7 1 5 4 5 3 5 0 6           | 65 3 3 7 69 03 01 97 5 5 0 0 37 1 1            | 289 31 20 7 27 113 3 35 15 8 70 511 74 606 120 9 1 1 128 142 16 198 11 2 28 26 7      |
| 14 | 6 1 1 5 2 2 8 7 4 0 3                     |                                                | 13 29 57 7 33 0 3 11 14 8 1 0 13 5 7 3 1 24 10 4 9 29 1 71 4 0 19 27 2 93 2 11 14 52  |
|    |                                           |                                                | 3 0 2 20 12 7 4 12 457                                                                |
|    | 0 0                                       |                                                | 15011 110 92 97 96 3 32 17 75 24 4 34 0 20 31 6 10 13 11 1 6 6 7 0 6 6 14 5 5 12 0    |
| PS | 6 1 3 3 4 4 2 2 1 0 2 2 1 0 2 2 1         | 10 26 32 35 37 18 14 12 92 39 38               | 16 2 0 0 19 16 0 0 3 7 10 12 8 3 2 3 4 2 0 4 2 0 2 2 4 0 0 5 1 21 3255 1552 412 803   |
| 13 | 3 9 2 2 8 7 7 6 1 6 0 3 5 4 0 5 0         | 67 5 3 5 46 45 56 23 38 4 8 8 9 9 10           | 292 153 63 138 147 188 82 54 171 4 82 81 86 82 130 25 156 72 85 64 1 150 2 100        |
|    |                                           |                                                | 25 7 2 83 91 35 50 126 77 3 32 63 6 42 13 63 8 23 12 5 27 49 1 14 13 12 27 5 8 12     |
|    |                                           |                                                | 5 5 4 2 10 14 3 16 9 21 19 11 22 78 27 20 19 14 358                                   |
|    | 0 0                                       |                                                | 27261 104 130 3 33 18 18 65 94 31 64 42 14 33 8 34 21 20 9 4 23 58 8 3 3 0 11 10      |
| PS | 8 1 4 4 6 1 6 0 8 6 6 1 0 2 2 9 1 9 5 3 3 | 14 49 27 49 35 19 12 14 97 45 31               | 8 11 1 13 6 15 21 12 15 4 11 8 1 24 5 7 0 6 5 2 1 2 3 3 0 0 5 4 8 0 0 2 46 3054 1279  |
| 14 | 7 8 5 8 5 8 6 7 5 5 3 1 0 5 9 0 7         | 37 3 7 8 80 62 11 17 22 2 7 1 13 7 8           | 634 938 320 68 58 14 204 124 617 83 55 95 284 143 131 46 3 57 199 52 97 41 0 6        |
|    |                                           |                                                | 1 20 6 0 3 31 33 76 5 8 118 1 14 142 0 19 2 79 21 69 10 5 13 21 0 10 44 5 12 3 3 20   |
|    |                                           |                                                | 109 36 37 10 6 9 7 7 6 0 16 27 8 3 5 39 7 11 261                                      |
|    | 0 0                                       |                                                | 1731 86 60 116 129 11 55 13 99 34 11 59 0 57 14 8 14 11 18 0 42 4 0 1 6 5 7 5 8 3     |
| PS | 7 2 1 3 1 0 9 6 2 2 1 1 8 2 3 3           | 12 28 36 34 70 31 92 14 10 51 50 61            | 3 14 3 0 1 7 7 4 0 3 2 14 3 2 3 4 6 9 2 0 1 1 1 5 0 0 0 0 5 0 40 2113 1523 67 573 342 |
| 15 | 4 8 1 6 7 2 9 1 6 1 0 3 4 1 3 7           | 05 3 2 9 70 57 2 71 43 6 9 7 4 27 5            | 115 186 13 63 222 460 41 173 21 157 90 23 187 82 23 32 28 336 108 2 10 60 68 21       |
|    | 8 5 4 8 2 5 2 3 1 9 1 9 4                 |                                                | 40 29 33 24 64 16 20 138 5 56 56 2 42 1 34 17 3 4 1 10 16 4 4 4 4 21 0 5 4 0 1 5 2 9  |
|    |                                           |                                                | 4 10 3 33 13 11 27 6 0 88 12 5 9 250                                                  |
|    | 0 0                                       |                                                | 1668 5 98 162 12 84 56 64 6 42 34 12 22 31 46 26 32 5 14 1 24 3 5 10 17 8 15 15       |
| PS | 8 2 1 2 1 6 9 3 1 3 9 6 1 5 6 5           | 52 33 24 21 45 15 21 66 58 33 21               | 10 3 76 4 7 5 10 4 10 1 1 3 2 2 1 0 6 14 1 1 6 11 2 20 9 3 3 3 1 3 0 0 99 2625 2198   |
| 16 | 0 9 7 7 2 1 7 8 5 8 6 9 9 2 9 8 6         | 6 3 5 0 69 38 24 14 4 9 1 9 15 0 6             | 258 607 609 47 137 47 131 298 64 90 248 14 113 142 178 65 136 120 32 31 22 33         |
|    | 2 7 6 1 5 9 4                             |                                                | 103 222 22 113 10 10 6 26 22 50 59 29 163 2 11 26 14 20 0 95 28 8 10 27 18 42 0       |
|    |                                           |                                                | 13 56 12 113 2 3 7 1 9 7 6 22 7 11 18 30 3 17 2 18 3 9 7 35 20 191                    |
|    | 0 0                                       |                                                | 0273 2 83 62 18 92 114 21 2 61 115 11 103 16 33 47 23 40 16 42 17 6 40 28 13 29       |
| PS | 0 3 1 3 1 7 9 6 0 4 1 5 1 1 2 1           | 56 56 39 67 26 39 21 14 10 71 18 50            | 9 4 5 5 42 8 21 28 20 4 10 3 3 2 8 3 7 0 22 3 0 8 2 8 1 15 7 18 7 7 4 6 0 116 2999    |
| 17 | 8 4 1 2 4 2 6 7 6 5 0 1 6 4 2 7 0         | 5 4 5 5 5 39 65 14 25 5 8 5 23 17 9            | 1487 918 756 756 22 356 56 91 185 115 146 80 2 38 210 218 77 20 40 31 45 45 87        |
|    | 2 4 2 6 7 4 5 8 1 3 8                     |                                                | 1 26 2 27 7 0 41 9 46 52 7 13 31 2 13 34 15 23 26 8 64 23 17 4 16 44 59 110 29 10     |
|    |                                           |                                                | 18 21 37 7 0 18 17 10 6 7 9 8 13 2 21 6 7 1 6 9 4 5 231                               |
|    | 0 1 1 4 6 5 7 2 5 3                       |                                                | 2330 15 1 25 16 72 5 69 7 20 11 5 29 17 18 7 5 4 1 14 5 60 4 10 20 15 16 13 3 6 13    |
| PS | 1 2 1 3 1 0 8 3 0 5 7 0 4 8 8 3           | 55 18 17 36 33 11 74 51 32 28                  | 0 4 3 2 0 7 4 8 2 7 4 1 1 3 14 5 7 0 3 3 3 0 3 1 2 1 0 0 0 35 2376 1328 1455 583 505  |
| 18 | 3 5 7 8 3 2 6 6 3 2 3 7 8                 | 5 4 7 83 66 41 00 69 6 2 2 1 25 0 4            | 154 149 23 52 283 153 138 59 10 53 222 147 22 7 27 119 93 40 138 24 48 5 59 9 2       |
|    | 1 8 2 9 8 3 2 1 5                         |                                                |                                                                                       |

8



9

**Table S1d.** potential mineralization activities.

| SAMPLE                          | BR             | SM             | PE             |
|---------------------------------|----------------|----------------|----------------|
|                                 | µg C. g-1 soil | µg C. g-1 soil | µg C. g-1 soil |
| PA1                             | 37.9152        | 161.9064       | 18.324         |
| PA2                             | 18.2232        | 130.0248       | 17.4096        |
| PA3                             | 19.3032        | 149.544        | 13.2408        |
| PA4                             | 38.5344        | 124.2864       | 30.4992        |
| PA5                             | 21.5568        | 150.624        | 13.6296        |
| PA6                             | 31.716         | 137.088        | 17.6472        |
| PA7                             | 12.8592        | 202.3344       | 19.9512        |
| PA8                             | 11.664         | 199.2456       | 23.8968        |
| PA9                             | 45.3672        | 165.3624       | 19.044         |
| PS1                             | 52.6104        | 141.9696       | 9.4032         |
| PS2                             | 33.372         | 167.472        | 29.0376        |
| PS3                             | 24.2136        | 137.6712       | 12.1248        |
| PS4                             | 32.0976        | 174.9024       | 17.4384        |
| PS5                             | 31.7232        | 191.484        | 27.324         |
| PS6                             | 49.7232        | 205.7616       | 18.576         |
| PS7                             | 22.68          | 171.792        | 16.956         |
| PS8                             | 35.8704        | 153.6912       | 15.7464        |
| PS9                             | 33.408         | 207.5472       | 24.3216        |
| PS10                            | 35.1           | 188.0496       | 25.344         |
| PS11                            | 23.0184        | 155.268        | 19.7928        |
| PS12                            | 60.8544        | 120.8736       | 24.7176        |
| PS13                            | 20.7504        | 184.0392       | 23.8032        |
| PS14                            | 26.6472        | 191.1168       | 20.5344        |
| PS15                            | 18.0936        | 193.1832       | 25.0416        |
| PS16                            | 24.696         | 229.6368       | 28.584         |
| PS17                            | 32.3064        | 207.6408       | 30.5712        |
| PS18                            | 47.9304        | 242.1504       | 32.724         |
| PS19                            | 42.2856        | 238.752        | 37.3536        |
| PS20                            | 29.7288        | 215.244        | 32.1552        |
| PS21                            | 24.7968        | 201.1176       | 29.5416        |
| PS22                            | 21.4128        | 196.5456       | 26.352         |
| PS23                            | 29.88          | 203.7168       | 30.204         |
| PS24                            | 53.064         | 167.0256       | 48.0672        |
| <b>Minimum</b>                  | 11.664         | 120.8736       | 9.4032         |
| <b>Maximum</b>                  | 60.8544        | 242.1504       | 48.0672        |
| <b>Median</b>                   | 31.716         | 184.0392       | 23.8968        |
| <b>Mean</b>                     | 31.618         | 179.002        | 23.616         |
| <b>Standard Error</b>           | 11.932         | 32.130         | 7.921          |
| <b>Coefficient of variation</b> | 38%            | 18%            | 34%            |

**Table S2.** Correlation matrix (Pearson (n)) calculated on all abiotic, biotic and agricultural variables.

[illegible]









[illegible]



[illegible]



|               |       |        |       |       |       |       |       |       |       |       |       |       |       |       |       |        |        |        |        |        |        |        |        |        |        |        |        |        |        |        |        |        |        |        |        |        |        |        |        |        |        |        |        |        |        |        |        |        |        |        |        |        |         |         |         |         |         |         |         |         |         |         |         |         |
|---------------|-------|--------|-------|-------|-------|-------|-------|-------|-------|-------|-------|-------|-------|-------|-------|--------|--------|--------|--------|--------|--------|--------|--------|--------|--------|--------|--------|--------|--------|--------|--------|--------|--------|--------|--------|--------|--------|--------|--------|--------|--------|--------|--------|--------|--------|--------|--------|--------|--------|--------|--------|--------|---------|---------|---------|---------|---------|---------|---------|---------|---------|---------|---------|---------|
| Com post      | 0.045 | 0.058  | 0.182 | 0.153 | 0.167 | 0.091 | 0.089 | 0.047 | 0.114 | 0.333 | 0.301 | 0.225 | 0.131 | 0.049 | 0.046 | 0.0016 | 0.0083 | 0.0046 | 0.0037 | 0.0047 | 0.0070 | 0.0014 | 0.0021 | 0.0038 | 0.0015 | 0.0026 | 0.0011 | 0.0022 | 0.0088 | 0.0012 | 0.0082 | 0.0006 | 0.0016 | 0.0009 | 0.0016 | 0.0068 | 0.0004 | 0.0041 | 0.0011 | 0.0059 | 0.0007 | 0.0041 | 0.0012 | 0.0015 | 0.0006 | 0.0006 | 0.0008 | 0.0013 | 0.0001 | 0.0012 | 0.0032 | 0.0011 | -0.0006 | -0.0017 | -0.0012 | -0.0019 | -0.0008 | -0.0019 |         |         |         |         |         |         |
| Cattle manure | 0.123 | -0.213 | 0.009 | 0.046 | 0.264 | 0.277 | 0.093 | 0.066 | 0.223 | 0.385 | 0.383 | 0.181 | 0.113 | 0.168 | 0.016 | 0.034  | 0.041  | 0.0014 | 0.0021 | 0.0004 | 0.0027 | 0.0015 | 0.0017 | 0.0015 | 0.0001 | 0.0010 | 0.0011 | 0.0006 | 0.0027 | 0.0010 | 0.0010 | 0.0011 | 0.0006 | 0.0017 | 0.0010 | 0.0025 | 0.0001 | 0.0010 | 0.0000 | 0.0029 | 0.0000 | 0.0027 | 0.0000 | 0.0006 | 0.0013 | 0.0027 | 0.0009 | 0.0036 | 0.0015 | 0.0026 | 0.0010 | 0.0023 | 0.0028  | -0.0020 | -0.0026 | -0.0004 | -0.0048 | -0.0022 | -0.0017 |         |         |         |         |         |
| Tree count    | 0.103 | -0.142 | 0.024 | 0.139 | 0.103 | 0.223 | 0.216 | 0.011 | 0.129 | 0.006 | 0.041 | 0.122 | 0.081 | 0.138 | 0.048 | 0.0116 | 0.0011 | 0.0022 | 0.0012 | 0.0016 | 0.0003 | 0.0011 | 0.0008 | 0.0028 | 0.0022 | 0.0013 | 0.0000 | 0.0010 | 0.0011 | 0.0003 | 0.0010 | 0.0011 | 0.0011 | 0.0018 | 0.0005 | 0.0028 | 0.0012 | 0.0011 | 0.0024 | 0.0012 | 0.0044 | 0.0056 | 0.0086 | 0.0045 | 0.0061 | 0.0010 | 0.0016 | 0.0008 | 0.0015 | 0.0003 | 0.0009 | 0.0015 | 0.0006  | 0.0014  | 0.0008  | 0.0004  | 0.0003  | 0.0007  | -0.0009 | -0.0032 | -0.0012 | -0.0020 | -0.0035 | -0.0093 |

Blue variables represent additional quantitative variables. Grey boxes indicates significant correlations ; bold correlation coefficients represent P-values < 0.01; underlined correlation coefficients represent P-values < 0.05; and italic correlation coefficients represent P-values < 0.1

Abrevations list: DD: Decimal degree; OS: off-season; C,E,C,: Cation exchange capacity; tot: total; Kt :kaolinite; Gb: gibbsite; C:N: Carbon-to-Nitrogen ratio; min: mineral; av: available; MBP: microbial phosphorus; BR: basal respiration; SM: Straw mineralization; PE: Priming Effect.
